# Supplementary material
Source: PubMed Central journal article supplement (PMC8038968)
Supplement: NIHMS1667202-supplement-2.pdf [file NIHMS1667202-supplement-2.pdf]

## 1 Supplementary Information

### 2 KEGG pathway sign test

3 KEGG pathway release 92.0 was downloaded using KEGGREST R package. We used the sign  
4 test to test for independent *cis* changes showing deviations from neutrality, thus pointing to  
5 lineage-specific selection<sup>9,49</sup>. If any pathway deviates significantly from the random expectation,  
6 then the null hypothesis of neutrality can be rejected in favor of polygenic selection. We  
7 discarded pseudogenes and used pathways with a minimum of 50 genes linked to them, with no  
8 threshold on ASE significance. *Drug metabolism - other enzymes*, *Steroid hormone biosynthesis*,  
9 *Drug metabolism - cytochrome P450*, and *Metabolism of xenobiotics by cytochrome P450*  
10 pathways were removed from the analysis as genes associated with them are found mainly in  
11 clusters and therefore their expression changes cannot be treated as independent events. Disease  
12 and genetic information processing pathways (e.g., *Transcription*) were not tested. Chromosome  
13 20 and chromosome X were removed from the analyses as well due to potential aneuploidy<sup>12</sup> and  
14 non-random deactivation that could shift results. We also examined how various FDR and fold-  
15 change thresholds affect the test and found that the down:up ratio among Hh genes increases as  
16 more stringent thresholds are used (Extended Data Fig. 3a).

17 Similarly, we tested protein translation rates<sup>52</sup>. This dataset provided information for 34 out of  
18 the 50 Hh proteins annotated in KEGG. Differential translation rates data (33 of the proteins) and  
19 detectable/non-detectable translation levels data (one protein) were combined for the sign test  
20 analysis.

21

22 EVC2 expression

23 To pick a top candidate for further analyses, we took all genes that are expressed in both hybrid  
24 cell types (mean FPKM  $\geq 1$ ), show significant ASE in both, and are linked to at least one HPO  
25 phenotype with human-chimpanzee divergence information (see above). Out of 268 such genes,  
26 EVC2 was the gene farthest from the origin of axes (Fig. 3b). For its phenotypic analyses,  
27 phenotypes were extracted from HPO build 1268 and from a review of the literature  
28 (Supplementary Tables 21-23).

29 EVC2 acts in a complex with EVC, whose loss-of-function phenotypes are indistinguishable  
30 from EVC2. We detect up-regulation of *EVC* human alleles compared to chimpanzees in the  
31 hybrid CNCCs (2.25x, FDR =  $2.52 \times 10^{-19}$ ), but not parental samples, suggesting counteracting  
32 *cis*- and *trans*-acting changes. As the abundance of the EVC/EVC2 complex is determined by the  
33 less abundant protein<sup>91</sup>, and the expression levels of *EVC* are 7-8x higher than those of *EVC2* in  
34 parental and hybrid CNCCs, it is likely that the down-regulation of EVC2 reduces the overall  
35 abundance of the complex.

36

37 DPSCs

38 **Human DPSCs:** Human DPSCs were ordered from Lonza (catalog #PT-5025). Cells were  
39 grown in DPSC medium catalog #: PT-3005 (AXOL).

40 **Chimpanzee DPSCs:** An incisor and a canine tooth were recovered from a forty-seven year old  
41 female chimpanzee euthanized for clinical reasons at the Yerkes National Primate Research  
42 Center. The teeth surfaces were cleaned and dissected at the cementum-enamel junction to reveal

43 the pulp chamber. The dental pulp was recovered followed by digestion in 3 mg/ml collagenase  
44 type I (Invitrogen, Inc.) and 4 mg/ml of dispase (Invitrogen, Inc) for one hour at 37°C. The cell  
45 suspension was filtered through a 70 µm cell strainer (Falcon, Inc) to remove cell debris and  
46 undigested tissues. The single-cell suspensions of the dental pulp were recovered and cultured in  
47 α-MEM (Invitrogen, Inc.) media supplemented with 20% fetal bovine serum (Hyclone, Inc), 100  
48 µM L-ascorbic acid-2-phosphate (Sigma, Inc), 2 mM glutamine, 100 units/ml penicillin and 100  
49 µg /ml streptomycin (Invitrogen, Inc.), and incubated at 37°C with 5% CO<sub>2</sub>. Medium was  
50 replaced every three to four days and cells were passaged at 80% confluence. Cells were grown  
51 in DPSC medium catalog #: PT-3005 (AXOL).

52

### 53 *Candidate regions underlying EVC2 differential expression*

54 CNCC ATAC-seq, and NR2F1 and TFAP2A ChIP-seq reads were downloaded from GEO  
55 accession number GSE70751. Reads were aligned to the human hg38 and chimpanzee panTro5  
56 genomes using Bowtie2 [<sup>92</sup>] and the parameters --very-sensitive --dovetail --maxins 2000. Peaks  
57 were called using MACS2 v2.1.1.20160309 [<sup>93</sup>] with the parameters -g hs -B -q 0.05. First, we  
58 searched for any region within the gene body or promoter (up to 5 kb upstream) of *EVC2* for loci  
59 with an ATAC-seq peak in all individuals of one species, but none of the individuals of the other  
60 species (two chimpanzees and three humans, with two replicates each, except for human 1).  
61 Three such loci were found (hereinafter, intron 6, intron 9 and intron 19, Extended Data Fig. 4a-  
62 c). Next, we picked the boundaries for the sequences used for the reporter assay (see next) based  
63 on the center of TFAP2A or NR2F1 binding (the stronger of the two transcription factors per  
64 each locus), up to 10 kb away from the ATAC-seq peak. Given its regulatory role, the promoter  
65 of *EVC2* was cloned as well. We also cloned a locus within intron 1 which was previously

66 reported to bear chimpanzee-biased H3K27ac marks<sup>43</sup> (but did not show any species-specific  
67 chromatin accessibility).

68

69 To construct reporter plasmids containing chimpanzee and human *EVC2* genomic loci, DNA  
70 sequences were amplified from genomic DNA samples using primers listed in Supplementary  
71 Table 24. The amplified products were then inserted into the pGL4.11b (Promega) vector for the  
72 promoter and pGL4.23 (Promega) vector for candidate enhancers. Cloned DNA sequences were  
73 validated by Sanger sequencing. For the chimpanzee sequence within intron 6, we were unable to  
74 amplify the full region denoted by the primers from genomic DNA due to repetitive regions.  
75 Instead, we were able to amplify a 626 bp sequence that included the beginning and end of the  
76 region, without the repeats in its center (Supplementary Table 25). We confirmed that the  
77 sequence was still specific to *EVC2* intron 6 via the UCSC Genome Browser BLAT tool. This  
78 626 bp is in fact more homologous to the human sequence than the entire length, as the repeats in  
79 the center of the chimpanzee sequence do not exist in the human sequence. For the intron 19  
80 locus, repetitive sequences in the primer regions did not allow us to clone sequences with  
81 identical boundaries: the resulting chimpanzee sequence had additional 16 bp in its 5' end, and  
82 45 bp in its 3' end, while the rest of the 1.4 kb was homologous. Reporter plasmids and the  
83 Renilla luciferase plasmid pGL4.73 (Promega) were co-transfected into human DPSCs in each  
84 well of a 48-well plate using X-tremeGENE HP DNA Transfection Reagent (Sigma-Aldrich)  
85 according to the manufacturers' protocol. To correct for transfection efficiency, 240 ng of  
86 reporter plasmid and 60 ng of pGL4.73 were transfected. 48 hours post-transfection, cells were  
87 harvested and reporter activity was measured using the Dual-luciferase reporter assay system  
88 (Promega) according to the manufacturers' protocol. Reporter activity was quantified using the

89 Glomax 96-well plate luminometer (Promega). Relative firefly/Renilla luciferase values were  
90 determined in two independent experiments of quadruplet measurements ( $n = 8$ ).

91 The intron 6 and 19 loci showed increased expression of the chimpanzee allele (3.6-fold and  $P =$   
92  $8.2 \times 10^{-4}$  for intron 6, and 4.1-fold and  $P = 9.4 \times 10^{-4}$  for intron 19, one-tailed  $t$ -test, Extended Data  
93 Fig. 4d,e). The promoter and intron 9 loci did not show significant differential expression ( $P =$   
94  $0.07$  for the promoter, and  $P = 0.08$  for intron 9, one-tailed  $t$ -test), while the intron 1 locus  
95 showed human-biased expression ( $P = 4.7 \times 10^{-9}$ ). Based on the ATAC-seq data, intron 1 is not  
96 accessible in either species. Therefore, it remains to be determined whether this region plays an  
97 active regulatory role *in vivo* (possibly attenuating the effect of other loci), or alternatively, has  
98 the potential to drive differential expression, but is not accessible in its endogenous context. The  
99 intron 6 and intron 19 loci each have over ten substitutions between humans and chimpanzees,  
100 making the investigation of specific expression-altering sequence changes a challenging task.

101 The intron 19 locus also has two indels (7 bp and 24 bp long), and the intron 6 locus has a 1.2 kb  
102 long indel. Given its length, the 1.2 kb indel serves as a promising candidate to underlie the  
103 expression difference we observed. Comparing this locus with the gorilla genome (gorGor5), we  
104 found that this sequence does not exist in gorillas, suggesting that the insertion likely emerged  
105 along the chimpanzee lineage. At first glance, this does not fit with the observed differential  
106 expression of *EVC2*, which likely emerged along the human lineage. However, although humans  
107 show lower *EVC2* expression compared to gorillas (Extended Data Fig. 3e), the human-gorilla  
108 ratio is lower than the human-chimpanzee ratio, suggesting there might have been an additional  
109 event along the chimpanzee lineage increasing *EVC2* expression. Importantly, the chimpanzee  
110 region amplified for the reporter assay did not include most of this insertion (due to its  
111 repetitiveness), and therefore serves as a more closely matched sequence to the human sequence.

112 Regardless, the comparative ATAC-seq, TFAP2A and NR2F1 analyses described above  
113 identified sites outside this insertion showing chimpanzee-biased patterns. This suggests that  
114 intron 6 might have experienced a more complex regulatory evolution, with changes affecting  
115 *EVC2* expression in both directions.

116 To identify potential sequence changes that might underlie these expression changes, we scanned  
117 the intron 6 and intron 19 loci for predicted transcription factor binding sites that differ between  
118 human and chimpanzees. We downloaded the 4,351 *directly determined* human transcription  
119 factor binding motifs from the Catalogue of Inferred Sequence Binding Preferences (CIS-BP)  
120 database (<http://cisbp.ccb.utoronto.ca/>), and used FIMO<sup>94</sup> to map each motif to the human and  
121 chimpanzee sequences. For each predicted binding site, we required that at least one species had  
122 a binding *q*-value  $\leq 0.05$ . Then, we searched for instances where the predicted binding score of  
123 the motif differed between the species. In the intron 6 locus, we found 1,091 predicted binding  
124 differences, all of which are in the repetitive regions of the intron, and 51 of those are within the  
125 homologous repetitive region that is outside the chimpanzee insertion. In the intron 19 locus, we  
126 found 31 predicted binding differences, and two additional predicted binding motifs outside the  
127 region that was amplified in the human sequence (Supplementary Tables 26-27). Next, we  
128 analyzed ChIP-seq data from ENCODE<sup>95</sup> to determine if any of the predicted binding sites are  
129 indeed bound by the predicted transcription factor in embryonic stem cells (as CNCC ChIP-seq  
130 data for these factors were not available). We found that four of the transcription factors (TCF12,  
131 RXRA, SP1, and SRF) were mapped in the ENCODE project. For one of them (SRF) there are  
132 reported peaks (chr4:5573026-5573222 and chr4:5573079-5573309) overlapping the predicted  
133 motif in intron 19 (chr4:5573215-5573228). SRF is expressed in CNCCs (TPM = 39.2),  
134 suggesting this binding site may be occupied by this factor in CNCCs as well. Notably, none of

135 the positions of the substitutions in intron 6 nor intron 19 are particularly conserved among  
 136 vertebrates (PhyloP score range: -3.54 to -0.13 for intron 6, and -3.42 to 0.07 for intron 19).  
 137 Thus, further work is required to determine whether the expression changes we report were  
 138 driven by these divergent sequences, and if so, to tease out the individual contribution of each of  
 139 these substitutions and indels to the overall expression change.

140

141 **Supplementary Table 24:** Genomic coordinates, primers and vectors used in the construction of chimpanzee (Ch)  
 142 and human (Hu) *EVC2* reporter plasmids.

| Reporter Plasmid     | Genomic Coordinates          | Genomic DNA Primers                                                        | pGL vector |
|----------------------|------------------------------|----------------------------------------------------------------------------|------------|
| <i>EVC2</i> promoter | panTro5=chr4:6171370-6174138 | Fwd: CCAGCTTGTTTCTAGTTTGTT<br>TCATCATTTCTCATGGC<br>Rev: TGGGCCAGACCATTGACC | pGL4.11b   |
|                      | hg38=chr4:5707417-5710191    | Fwd:<br>CCAGCTTGTTTCTAGTTTGTTTCATCATTTCTCATGGC<br>Rev: TGGGCCAGACCATTGGCC  | pGL4.11b   |
| <i>EVC2</i> intron 1 | panTro5=chr4:6164402-6166648 | Fwd: GCAGACCATTCTACTGGAAGTTG<br>Rev: AAATACACCCATGTGGTCTCTGA               | pGL4.23    |
|                      | hg38=chr4:5700284-5702536    | Fwd: GCAGACCATTCTACTGGAAGTTG<br>Rev: CTTAACAATAACATCCATGTGGTC              | pGL4.23    |
| <i>EVC2</i> intron 6 | panTro5=chr4:6146850-6148511 | Fwd: CAGAACTCTGAATGAAATGAAATG<br>Rev: GGGGTTCTAAGGGGTAGAG                  | pGL4.23    |
|                      | hg38=chr4:5683604-5684029    | Fwd: CAGAACTCTGAATGAAATGAAATG<br>Rev: GGGGTTCTAAGGGGTAGAG                  | pGL4.23    |
| <i>EVC2</i> intron 9 | panTro5=chr4:6106169-6107052 | Fwd: GATCAGTGGGGTGGCTATC<br>Rev: TTGATCAACTGCGGTCTTTATTC                   | pGL4.23    |
|                      | hg38=chr4:5647354-5648240    | Fwd: GATCAGTGGGGTGGCTATC<br>Rev: TTGATCAACTGCGGTCTTTATTC                   | pGL4.23    |

|                       |                              |                                                               |         |
|-----------------------|------------------------------|---------------------------------------------------------------|---------|
| <i>EVC2</i> intron 19 | panTro5=chr4:6031719-6033215 | Fwd: AGAGGATGCTCAATCAGTGCTAA<br>Rev: ATAACAGGCATGGCAGGTGTT    | pGL4.23 |
|                       | hg38=chr4:5573074-5574468    | Fwd: CCAGTCGATGTCTTTTCTGTGAT<br>Rev: GTG TTCAGGAAGTACCAGCTCCT | pGL4.23 |

143

144

145 **Supplementary Table 25:** Chimpanzee *EVC2* intron 6 locus amplified from genomic DNA sample.

```

GGGGTTCCTAAGGGGTAGAGTCAATATCACAGACAGGAACCAAACAAAGTAACAGGCGGGACTAT
TTCAGGGTGGGGCAGGGGAAGCCACGAGGAAGGTCCTCCCGGAGCATGCAGGGAGCCAGGCTCTG
CGGAACCACAAACCTCCCCCTGCTCAAGCCAGCCCAGCCCAGGAACACACACAGCTGCCAGGAAC
ACACACAGCTGGCCAGGAACACACACAGCTGCCAGGAACACACACAGCTGCCGGGAACATACA
CACAGCTGCCGGGAACACACACAGCTGCCGGGAACACACACAGCTGCCGGGAACACACACAC
AGCTGCCGGGAACACACACAGCTGCCGGGAATACGCACAGCTGCCGGAAACACACACAGCTG
CCCAGGAACACACACAGCTGCCAGGAACACACAGAGCTGCCGGGAACATACACACAGCTGCC
GGGAACACACACAGCTGCCAGGAACACACACAGCTGCCAGGAACACACAGAGCTGCCGGGAA
CACACACAGCTGCCGGGAACACACACAGCTGCCGGGGCTTCAGCTCCTGAGGCTCCTGCCTGAG
GACATGGAAGCTTCCATTTTCATTTTCATTCAGAGTTTCTG

```

146



147 See Supplementary Figure for BLAST<sup>96</sup> alignments.

| Species | Seq ID | Sequence                                                       | Position |
|---------|--------|----------------------------------------------------------------|----------|
| Chimp   | 1      | GGGTTCTTAAGGGTAGACTCAATATCACAGCAGGAACCAACAAAGTAACAGGCGGG       | 60       |
| Human   | 1      | .....T.....T.....T.....C.....                                  | 60       |
| Chimp   | 61     | ACTATTTTCAGGCTGGGCAGGGGAAGCCAGAGGAGGTCTCCCGAGCATGCAGGGAG       | 120      |
| Human   | 61     | .....A.....                                                    | 120      |
| Chimp   | 121    | CCAGGCTCTGCGGAACCACAACTCCCCCTGCTCAagccagccagcccaggaacacac      | 180      |
| Human   | 121    | .....G.....                                                    | 180      |
| Chimp   | 181    | acagctgccaggaacacacacagctgcccaggaacacacacagctgcccagga-----     | 236      |
| Human   | 181    | .....G.....ACAC..                                              | 240      |
| Chimp   | 237    | acacacagctgccgggaacatacacacagctgccgggaacacacacagctgccggga      | 296      |
| Human   | 241    | .....A.....G.....A.A.....                                      | 298      |
| Chimp   | 297    | acacacacagctgccgggaacacacacacagctgcccgggaacacacacacacacacac    | 356      |
| Human   | 299    | .....G.....                                                    | 358      |
| Chimp   | 357    | G 357                                                          |          |
| Human   | 359    | . 359                                                          |          |
| Chimp   | 371    | gcccgggaacacacacagctgccgggaacacacacagctgccgggaacacacacagCT     | 430      |
| Human   | 167    | .....A.G.....G.....G.....C.....                                | 226      |
| Chimp   | 431    | GCCC-GGGA-acatacacacacagctgccgggaacacacacagctgccgggaacacacac   | 488      |
| Human   | 227    | .....A.A.C..C.....A.....G.....                                 | 286      |
| Chimp   | 489    | agctgccaggaacacacagctgcccggga--acacacacagctgccgggaacacacac     | 546      |
| Human   | 287    | .....A.A.G.....C.....AC.....                                   | 346      |
| Chimp   | 547    | acagctgccgggaacacacacacacacagctgcccgggaacacacacacacacacac      | 606      |
| Human   | 347    | .....G.....                                                    | 406      |
| Chimp   | 607    | CATTTCATTCAGAGTTTCTG                                           | 626      |
| Human   | 407    | .....                                                          | 426      |
| Chimp   | 1      | TTGATCAACTGCGGTCTTTATTCTTTTGTGCTCGAATTTTACCATTCTAGATTAAAA      | 60       |
| Human   | 1      | .....                                                          | 60       |
| Chimp   | 61     | AGCTTCGCTCCCTTAAGACACAACCTTAGCCTAGTTTAAACAACAGCTCATTCAATTCG    | 120      |
| Human   | 61     | .....                                                          | 120      |
| Chimp   | 121    | TTCTTTCAATTTTCACAAAAGTCTTATTGAACATGTGCTATGCAAGAGCGCTTTGCA      | 180      |
| Human   | 121    | .....                                                          | 180      |
| Chimp   | 181    | GGTACAAAGCAAGAAACACACAGAGCTGCCTCAAGGCACTGTGTATGGCTAAAT         | 240      |
| Human   | 181    | .....                                                          | 240      |
| Chimp   | 241    | GTCAAAATGAACATAACAATCAATGTTTACAAGCTCAGAAAAAATCCCTTCCCTACT      | 300      |
| Human   | 241    | .....T.....                                                    | 300      |
| Chimp   | 301    | CTGACGACAGACAGAAATGATTTCAACCTTAAACGAGCCTTATGTGCAAGGAGGACAC     | 360      |
| Human   | 301    | .....T.....                                                    | 360      |
| Chimp   | 361    | TGCCCCCGAAAGACATTCACAGCCTAATCCCAAGAAAGCCAGGAAACACAGTTAGTTTCATG | 420      |
| Human   | 361    | .....T.....                                                    | 420      |
| Chimp   | 421    | GCAAGGGAAATTAAGGCTACTCATCAGCTGACCTTAAGATTGAGATCAAGACAAAGCC     | 480      |
| Human   | 421    | .....                                                          | 480      |
| Chimp   | 481    | TTTTAAAAAGGAAACAGGCAAGAGGGGTGAGAGTTGGAGAACGCCCTGTGGCGAAG       | 540      |
| Human   | 481    | .....                                                          | 540      |
| Chimp   | 541    | GAAGCCGACATAGGAGTGTGACATCAGCTTTGGAGATAGAAAGGGTCCCAAGTCA        | 600      |
| Human   | 541    | .....C.....                                                    | 600      |
| Chimp   | 601    | TGAATGTAG--GCAGCCTCAAGAAGCCGAAAGGGCCAGGAAAGGAAACCTCCCTAGAG     | 657      |
| Human   | 601    | .....GCA.....                                                  | 660      |
| Chimp   | 658    | CTGACGTCTtttttttttAATTGACAAGTAAAGATGATATACATTTCTGGGCCATGTGA    | 717      |
| Human   | 661    | .....C.....                                                    | 720      |
| Chimp   | 718    | TAATTTAATACATTTCATTTAATGTGCAAGATTAAATCAGGTTAATTGGGATAGCCATCA   | 777      |
| Human   | 721    | .....C.....                                                    | 780      |
| Chimp   | 778    | CCTTAAATATTGTCTTTCTTTATGCTAGAAACATTAGAATTCCTCCCTCTAGCTATT      | 837      |
| Human   | 781    | .....C.....                                                    | 840      |
| Chimp   | 838    | CTGAAATGTGCAATAGATTATTGTAATGATAGCCACCCCACTGATC                 | 884      |
| Human   | 841    | .....                                                          | 887      |
| Chimp   | 17     | GTGTTGAGGAAGCACCAGCTCTCCCTGCCCTTTGGACACTGTCATTCAGGTCTAA        | 76       |
| Human   | 1      | .....T.....T.....T.....C.....                                  | 60       |
| Chimp   | 77     | CACTGGACCTTGTGGTACAGTCAACAGAAATAAGCCCTCCCAAAATGTCATGG          | 136      |
| Human   | 61     | .....C.....T.....                                              | 113      |
| Chimp   | 137    | TCCATCTCTGGGACCTGGGAAGATGTCACTTACAAGGCAAGGTTACTTTGCAAGTGG      | 196      |
| Human   | 114    | .....                                                          | 173      |
| Chimp   | 197    | AGTCAAGTCAAGGCTGGAGATAGGTTGGAAAGTGGTTATCTCAGATTATCCAGGTGG      | 256      |
| Human   | 174    | .....A.....T.....                                              | 233      |
| Chimp   | 257    | TTCCAATATAATTACCGTGTGGCTCTTAAAGATAGAGACCTTTCTGCTGTGAGGTC       | 316      |
| Human   | 234    | .....A.....                                                    | 293      |
| Chimp   | 317    | AGAGAGAGTGTGACGAGATGGAAGAGGGCCAGAGAGATGCAATTTTCTGCTTTGA        | 376      |
| Human   | 294    | .....G.....                                                    | 353      |
| Chimp   | 377    | AGATGAAGAAAGGAGCCATGAGCCAAAGGAAATAGTGCCTGGAAGCCAGGAATAC        | 436      |
| Human   | 354    | .....                                                          | 400      |
| Chimp   | 437    | CCCTGGCTGGCAGCCAGCAAGAAACAGGACCTCAGTCTCAACCAACAATGGGCTGAA      | 496      |
| Human   | 401    | .....                                                          | 449      |
| Chimp   | 497    | CCCTGCCAATTACTTAAGTGAAGCAGGAGCAGATTCTCCCTAAAGCTTCCGAAAGCCA     | 556      |
| Human   | 450    | .....A.....                                                    | 509      |
| Chimp   | 557    | GGCAATCTGCCAACCTCGATTTTGGCTGGAGAAACCTATGTTGGATTCTGACCTA        | 616      |
| Human   | 510    | .....C.....G.....                                              | 569      |
| Chimp   | 617    | CAGAACTTAAGTAAGTTTGTAGCTGTGATAAGCTGTGTTTGTGTCATTTGTGACAG       | 676      |
| Human   | 570    | .....                                                          | 629      |
| Chimp   | 677    | CAGTAGTAGGAACGAATTCATTAGGAGCTGCTGTGCTGGATGCAGCCAGCTGG          | 736      |
| Human   | 630    | .....                                                          | 689      |
| Chimp   | 737    | ACGCTTAAAGGCCCTAACCCCTCCTCTCTGCTGACTCCCTTCTTAGAGGCTGGGGGC      | 796      |
| Human   | 690    | .....                                                          | 749      |
| Chimp   | 797    | AAAGTACTCGCACCTCCCTGAGTGCAGGAGCCACGGCTCAGCTCAGGTTGCGA          | 856      |
| Human   | 750    | .....A.....                                                    | 809      |
| Chimp   | 857    | GGAAACCTGCTGAGGACTTTGGGGCATTGCTTCCCTGATGAGAAAGACAGCATG         | 916      |
| Human   | 810    | .....A.....                                                    | 869      |
| Chimp   | 917    | GTGGCAGTCTTTGACCTCTCCCTCTGCTGTAAGTATTGCAGTGCAGCACTGTA          | 976      |
| Human   | 870    | .....                                                          | 929      |
| Chimp   | 977    | GAAGGAAGTGGGAAAGATCCGACAGATGACCTGATGATGATGATGATGATGATGATG      | 1036     |
| Human   | 930    | .....T.....A.....                                              | 989      |
| Chimp   | 1037   | TCTCCGGAGTCAATGGCTGGCATTACCACTGTCTGAGTGTATTTCTGCTACTTAC        | 1096     |
| Human   | 990    | .....T.....G.....C.....                                        | 1049     |
| Chimp   | 1097   | ACACCCAGAAGCAGGAGGAGCCATCGCAGATGCGTAAACCCGATCGGTAGCAGA         | 1156     |
| Human   | 1050   | .G.....                                                        | 1109     |
| Chimp   | 1157   | CAGTCAAGTACATGACTGCATAGGCTCCCTGACAGCTCAGGGCTCTGATCAGGAAG       | 1216     |
| Human   | 1110   | .....                                                          | 1169     |
| Chimp   | 1217   | GGAGGTGAGTCTGCAACTCTGCGCAAGGATGAGAAAGTTGGCTGATCTCCACTCAGAG     | 1276     |
| Human   | 1170   | .....                                                          | 1229     |

148

149 **Supplementary Figure.** BLAST alignment between the chimpanzee and human amplified sequences for  
150 intron 6 (a), 9 (b) and 19 (c). Dots represent identities, lowercase letters show low complexity sequences.

151 We also used the CNCC ATAC-seq data to map peaks in putative enhancers associated with Hh

152 genes. To do so, we downloaded the GeneHancer database<sup>97</sup> (v4\_12) and extracted the 530

153 putative enhancers associated with Hh genes. For each putative enhancer, we investigated

154 chimpanzee and human ATAC-seq peaks 10 kb around it (Supplementary Table 28).

155

156 EVC2 effect on hedgehog signaling output

### 157 **Stable cell line generation**

158 *Evc2*<sup>-/-</sup> NIH/3T3 Flp-In cells were generated using CRISPR/Cas9 genome editing using the guide  
159 sequence 5'-gatatttcaaaaatgctcac-3', and were described previously in Pusapati et al.<sup>91</sup>.

160 Doxycycline-inducible Evc2 expression was generated by cloning mouse Evc2 (N-terminally  
161 tagged with 3xHA (downstream of signal sequence) and C-terminally tagged with 1D4) into the  
162 pCDH-Lenti-TRE-rtta3G-BLAST plasmid (gifted from Atul Kumar). Lenti-virus was generated  
163 by transfection of this construct in combination with psPAX2 (Addgene plasmid number 12260)  
164 and pVSVG (Addgene plasmid number 14888) into 293T cells. Lenti-viral supernatant was then  
165 added to *Evc2*<sup>-/-</sup> NIH/3T3 Flp-In cells for 48 hours before selection with puromycin  
166 (Calbiochem).

167 Generation of pooled cell lines expressing low, medium and high amounts of mouse Evc2 was  
168 carried out by cloning mouse Evc2 C-terminally tagged with TEV-YFP-FLAG into the pMSCV  
169 plasmid (Addgene plasmid number 24828). The pMSCV construct was then transfected into  
170 Bosc23 helper cells in order to generate retroviral supernatants<sup>98</sup>. Virus was added to *Evc2*<sup>-/-</sup>  
171 NIH/3T3 Flp-In cells after 24 and 48 hours by centrifugation for 1 hour at 800g. Stably infected  
172 cells were then selected by puromycin. High multiplicity of infection was evident by the death of  
173 only a small fraction (~5%) of cells. These cells were sorted into pools of 100,000 cells each by  
174 fluorescence activated cell sorting in order to isolate low, medium and high expressing pooled  
175 lines.

176

### 177 **Cell culture and Hedgehog signaling assays**

178 Both *Evc2*<sup>-/-</sup> NIH/3T3 Flp-In cells and Dental Pulp Stem Cells (DPSCs) were grown in high  
179 glucose Dulbecco's Modified Eagle's Medium (DMEM) (Thermo Fisher Scientific) containing  
180 10% Fetal Bovine Serum (FBS) (Sigma), 2 mM L-glutamine (Gemini Biosciences), 1× MEM  
181 nonessential amino acids solution (Gibco), penicillin (40 U/ml) and streptomycin (40 µg/ml)  
182 (Gemini Biosciences), and 1 mM sodium pyruvate (Gibco).

183 In order to test for Sonic Hedgehog ligand responsiveness, cells were ciliated by growing to  
184 confluency and then exchanging the media to low serum (0.5% FBS) DMEM containing the  
185 aforementioned supplements for either 24 hours (NIH/3T3 Flp-In cells) or 48 hours (DPSCs).  
186 Sonic Hedgehog ligand (recombinant protein generated as in Bishop et al.<sup>99</sup>) and doxycycline  
187 (Sigma, D9891) were added 24 hours prior to cell lysis and Western Blotting.

188 Primary antibodies used for Western Blotting include: mouse monoclonal anti-GLI1 (Cell  
189 Signaling, Cat# 2643; RRID: AB\_2294746), mouse monoclonal anti-alpha tubulin (clone DM1A,  
190 Sigma-Aldrich, Cat#T6199; RRID: AB\_477583), rabbit polyclonal anti-P38 (Abcam, Cat# ab7952;  
191 RRID: AB\_306166), rabbit anti-GFP (Novus Biologicals, NB600-308), rabbit polyclonal anti-SUFU  
192 (produced in rabbits (Josman Laboratories) and affinity purified before use), rabbit polyclonal anti-  
193 EVC2 (produced in rabbits (Cocalico Biologicals) and affinity purified before use). Secondary  
194 antibodies used for Western Blotting include: Peroxidase AffiniPure Donkey Anti-Mouse IgG (H+L)  
195 (Jackson ImmunoResearch Laboratories, Cat#715-035-150; RRID:AB\_2340770), Peroxidase  
196 AffiniPure Donkey Anti-Rabbit IgG (H+L) (Jackson ImmunoResearch Laboratories, Cat#111-035-  
197 144; RRID: AB\_2307391) and Peroxidase AffiniPure Donkey Anti-Goat IgG (H+L) (Jackson  
198 ImmunoResearch Laboratories, Cat#705-035-003; RRID: AB\_2340390).  
199

## 200 EVC2 CNCC-specific KO mice

201 All mice were maintained and used in compliance with the Institutional Animal Care and Use  
202 Committee (IACUC) of the University of Michigan in accordance with the National Institutes of  
203 Health guidelines for Care and Use of animals in research, and all experimental procedures were  
204 approved by the IACUC of the University of Michigan. All mice were housed in ventilated cages  
205 with free access to food and water. Ventilating cages were in rooms in 18-23 C with 40-60%  
206 humidity. Housing room has a 12 hours dark/light cycle with light starting from 6 am.

207 Two loxP sites were inserted to intron 12 and 14 of the *Evc2* locus, respectively. Cre-dependent  
208 recombination caused truncation at exon 15 to generate no functional protein<sup>63</sup>. Neural crest-  
209 specific *Evc2* mutant mice were generated by crossing *Evc2* floxed mice with *Wnt1-Cre* mice<sup>100</sup>.

210 Animals were harvested at postnatal day 28 (P28) for structural analyses.

211 Micro-CT scanning of fixed skulls was taken at the University of Michigan using a micro-CT  
212 system (mCT100 Scanco Medical, Bassersdorf, Switzerland). Scan settings were as following:  
213 voxel size 12  $\mu$ m, 55 kVp, 109 mA, 0.5 mm AL filter, and integration time 500 ms.

214 Heterozygous mice were used as controls because they are phenotypically indistinguishable from  
215 wildtype mice<sup>63</sup>.

216 To quantify skull morphological differences between controls and *Evc2* KO P28 mice, surface  
217 models were first generated based on micro-CT data. Next, each Ellis-van Creveld craniofacial  
218 phenotype was examined between control and KO mice and compared to phenotypes that  
219 separate humans and chimpanzees, as described above and in Gokhman et al<sup>48</sup>. For the *increased*  
220 *forehead height* phenotype, we examined frontal bone height. *Tapering of the lower face* was  
221 equated to ventral rotation of the lower face and micrognathia.

222 DICOM files/images obtained from micro-CT were used to generate 3D model using ITK-SNAP  
223 (www.itksnap.org). 3D slicer (www.slicer.org) was then used for placements of anatomical  
224 landmarks. The mandible associated measurements were determined using landmarks from  
225 Extended Data Fig. 6c, i.e., mandible length (1-4), condyle head width (3-4), gonial angle (the  
226 angle of 5-7 and 4-8 ) and mandible height (2-6). The thickness of the palate bone was  
227 determined at the palate bone at first molar levels. The root length and enamel thickness were  
228 determined in molar 1 of controls and KOs. Width of the nasal bone was determined at the most  
229 anterior part of nasal bones. These data were combined with previous measurements from *Evc2*  
230 KO mice, including of soft tissues<sup>63,64,68</sup>.  
231

| Panel | Species | Accession                                                   | Sequence                                                     | Position                                                    |     |
|-------|---------|-------------------------------------------------------------|--------------------------------------------------------------|-------------------------------------------------------------|-----|
| a     | Chimp   | 1                                                           | GGGGTTCCTAAGGGGTAGAGTCAATATCACAGACGAGCAACCAAAAGTAACAGCGGG    | 60                                                          |     |
|       | Human   | 1                                                           | .....T.....                                                  | 60                                                          |     |
|       | Chimp   | 61                                                          | ACTATTCAGGGTGGGGCAGGGAAGCCACGAGGAAAGTCTCCCGAGCATGCGAGGAG     | 120                                                         |     |
|       | Human   | 61                                                          | .....A.....                                                  | 120                                                         |     |
|       | Chimp   | 121                                                         | CCAGGCTCTGGGAACCAACAACCTCCCTCTCaaagccagccagccaggaacacac      | 180                                                         |     |
|       | Human   | 121                                                         | .....T.....G.....                                            | 180                                                         |     |
|       | Chimp   | 181                                                         | acagctgcccaggaacacacacagctgcccaggaacacacacagctgcccagga---ac  | 236                                                         |     |
|       | Human   | 181                                                         | .....G.....ACAC..                                            | 240                                                         |     |
|       | Chimp   | 237                                                         | acacacagctgcccggaaacacacacagctgcccggaaacacacacagctgcccggga   | 296                                                         |     |
|       | Human   | 241                                                         | .....A.....G.....A.....A.....                                | 298                                                         |     |
|       | Chimp   | 297                                                         | acacacacagctgcccggaaacacacacacagctgcccggaaacacacacacacac     | 356                                                         |     |
|       | Human   | 299                                                         | .....T.....                                                  | 358                                                         |     |
|       | Chimp   | 357                                                         | G 357                                                        |                                                             |     |
|       | Human   | 359                                                         | . 359                                                        |                                                             |     |
|       | Chimp   | 371                                                         | gcccggaaacacacacagctgcccaggaacacacacagctgcccaggaacacacacagct | 430                                                         |     |
|       | Human   | 167                                                         | .....A..G.....G.....G.....G.....C.....                       | 226                                                         |     |
|       | Chimp   | 431                                                         | GCCC-GGA-acatacacacacagctgcccggaaacacacacagctgcccaggaacacac  | 488                                                         |     |
|       | Human   | 227                                                         | .....A..A..C..C.....A.....G.....G.....G.....                 | 286                                                         |     |
|       | Chimp   | 489                                                         | agctgcccaggaacacacacagctgcccggga--acacacacagctgcccggaaacacac | 546                                                         |     |
|       | Human   | 287                                                         | .....A..A..G.....C.....A.....AC.....                         | 346                                                         |     |
|       | Chimp   | 547                                                         | acagctgcccggggCTTCAGTCTCTGAGGCTCTGCTGAGGACATGGAAGCTTCCATT    | 606                                                         |     |
|       | Human   | 347                                                         | .....T.....                                                  | 406                                                         |     |
|       | Chimp   | 607                                                         | CATTTCATTAGACTTTCTG 626                                      |                                                             |     |
|       | Human   | 407                                                         | .....T..... 426                                              |                                                             |     |
|       | b       | Chimp                                                       | 1                                                            | TTGATCAACTGCGGTTCTTATTCTTTTGTGATCGAATTTACCATTCTAGATTAATAA   | 60  |
|       |         | Human                                                       | 1                                                            | .....T.....                                                 | 60  |
|       |         | Chimp                                                       | 61                                                           | AGTCTCCGTCGCCCTTAAGACACAACTTAGCCTAGTTTTTAACAACAGCTCATTCTTTC | 120 |
|       |         | Human                                                       | 61                                                           | .....T.....                                                 | 120 |
|       |         | Chimp                                                       | 121                                                          | TTCCTTTCATTCTCAAAAAGTGTATTGAACTGTGCTATGCAACGAGCGCTTTGCA     | 180 |
|       |         | Human                                                       | 121                                                          | .....T.....                                                 | 180 |
| Chimp |         | 181                                                         | GGTTACAAAGCAAGAAAGAAACACAAGAGCTGCCTCAAGGCAGTGTGTATGGCTAAAT   | 240                                                         |     |
| Human |         | 181                                                         | .....T.....                                                  | 240                                                         |     |
| Chimp |         | 241                                                         | GTCAAATGACTAAACAATCAATGTTGTACAAGCTCAGAAAACAAAATCCCTTCCCTACT  | 300                                                         |     |
| Human |         | 241                                                         | .....T.....                                                  | 300                                                         |     |
| Chimp |         | 301                                                         | CTGAGACAGACAGAATGGATTTTCAACCTTAAAGCAAGCCCTTATGTGGCAGGGAGACAG | 360                                                         |     |
| Human |         | 301                                                         | .....T.....                                                  | 360                                                         |     |
| Chimp |         | 361                                                         | TGCCCCCGCAAGACATTACACAGCTAATCCCCAGACGGCAACACAGTGTAGTTTCAAG   | 420                                                         |     |
| Human |         | 361                                                         | .....T.....                                                  | 420                                                         |     |
| Chimp |         | 421                                                         | GCAAGGGGAATTAAGGTACTCATCAGCTGACCTTAAGATTGAGATCAAGACAAGGCC    | 480                                                         |     |
| Human |         | 421                                                         | .....T.....                                                  | 480                                                         |     |
| Chimp |         | 481                                                         | TTTTAAATAGGAAACAGGCAAGAGGGGTACAGATTTGGAGAAGCCCTGTGGCGAAG     | 540                                                         |     |
| Human |         | 481                                                         | .....T.....                                                  | 540                                                         |     |
| Chimp |         | 541                                                         | GAAGCCGACATAGGAGTATGACATCAGCTTTGGAGATAGAAAGGGGTCCCAAGTCAG    | 600                                                         |     |
| Human |         | 541                                                         | .....T.....                                                  | 600                                                         |     |
| Chimp |         | 601                                                         | TGAATGTAG--GCAAGCTCAAGAAGCGGAAAGGCCAGGAAGGGAACCTCCCTAGAG     | 657                                                         |     |
| Human |         | 601                                                         | .....GCA.....                                                | 660                                                         |     |
| Chimp |         | 658                                                         | CTGACGTCTTTTTTTAATTGACAAGTAATAGATGTATACATTTTCTGGGCCATGTGA    | 717                                                         |     |
| Human |         | 661                                                         | .....C.....                                                  | 720                                                         |     |
| Chimp |         | 718                                                         | TAAATTAATACATTTCATTAAATGTGCAAAAGATTAATCAGGTTAATGGGATAGCCATCA | 777                                                         |     |
| Human |         | 721                                                         | .....C.....                                                  | 780                                                         |     |
| Chimp |         | 778                                                         | CCTTAAATATTGCTCTTTCTTTATGCTAGAAACATTAGAATTCCTCCCTCTAGCTATT   | 837                                                         |     |
| Human |         | 781                                                         | .....C.....                                                  | 840                                                         |     |
| Chimp |         | 838                                                         | CTGAAATGTGCAATAGATTATTGTAATGATAGCCACCCACTGATC 884            |                                                             |     |
| Human |         | 841                                                         | .....T..... 887                                              |                                                             |     |
| c     | Chimp   | 17                                                          | GTGTTGAGGAAGCACCAGCTCCTCCCTGCCCCGTTTGGACACTGTCTTCCAGTGTAA    | 76                                                          |     |
|       | Human   | 1                                                           | .....T.....T.....C.....                                      | 60                                                          |     |
|       | Chimp   | 77                                                          | CACTGGCACCTTGTGGTACAGTCAACAGATAATGACCCCTCCCAAAATGTCCATGG     | 136                                                         |     |
|       | Human   | 61                                                          | .....C.....T.....                                            | 113                                                         |     |
|       | Chimp   | 137                                                         | TCCCTCCTGGACCTGCGAAGATGTCACTTACAAAGGCAAGGTTACTTTGCAAGTGGG    | 196                                                         |     |
|       | Human   | 114                                                         | .....T.....                                                  | 173                                                         |     |
|       | Chimp   | 197                                                         | AGTCAGGTCAGGGCCCTGGAGATAGGGTGGAAAGTGTATCTCAGATTATCCAGGTGG    | 256                                                         |     |
|       | Human   | 174                                                         | .....A.....T.....                                            | 233                                                         |     |
|       | Chimp   | 257                                                         | TTCCAAATATAATTACCCTGTGGTCTTAAGAGTAGAGACCTTCTCCCTGTGTGAGGTC   | 316                                                         |     |
|       | Human   | 234                                                         | .....A.....A.....T.....                                      | 293                                                         |     |
|       | Chimp   | 317                                                         | AGAGAGAGATGTGACAGGATGGAAGAAGGGCCAGAGATGCAATTTCCTGGCTTTGA     | 376                                                         |     |
|       | Human   | 294                                                         | .....G.....                                                  | 353                                                         |     |
|       | Chimp   | 377                                                         | AGATGAAGAAAGGAGCCATGAGCCAAGGAATGTAGGTGCCACTGGAAGCCAGGAATTC   | 436                                                         |     |
|       | Human   | 354                                                         | .....T.....                                                  | 400                                                         |     |
|       | Chimp   | 437                                                         | CCCTGGCTGGCAGCCAGCAAGAAACAGGACCTCAGTCTCAACCAATGGGCTGAA       | 496                                                         |     |
|       | Human   | 401                                                         | .....T.....                                                  | 449                                                         |     |
|       | Chimp   | 497                                                         | CCCTGCCAATTACTTAAGTAGCAGGAAGCAGATTCTCCCTTAAGCTTCCGAAAGGCA    | 556                                                         |     |
|       | Human   | 450                                                         | .....A.....                                                  | 509                                                         |     |
|       | Chimp   | 557                                                         | GGCAATCTGCCAACACCTCGATTTTGGCTGGGAAACCCATGTTGGATTTCTGACCTA    | 616                                                         |     |
|       | Human   | 510                                                         | .....C.....T.....G.....                                      | 569                                                         |     |
|       | Chimp   | 617                                                         | CAGAAGTTAAGTAAGTTTGTAGCTGTGTAAGTGTGCTTTGTGGTCAATTTGTGACAG    | 676                                                         |     |
|       | Human   | 570                                                         | .....T.....                                                  | 629                                                         |     |
|       | Chimp   | 677                                                         | CAGTAGAGAAACAGATTCATTGAGGAGTCGGTGTGCTGTGGTGCAGCCAGCTGG       | 736                                                         |     |
|       | Human   | 630                                                         | .....T.....                                                  | 689                                                         |     |
|       | Chimp   | 737                                                         | ACGCTTAAAGCCCTTAACCCCTCCTTCCTGCTGACTCCCTTCTTAGAGGCTGGGGGC    | 796                                                         |     |
|       | Human   | 690                                                         | .....T.....                                                  | 749                                                         |     |
|       | Chimp   | 797                                                         | AAAGTACTCGCACCTCCCTGACAGTAGAGGGCCACGGGTGAGTCTCAGGTTGCGA      | 856                                                         |     |
|       | Human   | 750                                                         | .....A.....                                                  | 809                                                         |     |
|       | Chimp   | 857                                                         | GGAAACCTGCTGAGGACTTGGGGCATTGCTTCTTGTAGAGAAGACAGGACATG        | 916                                                         |     |
|       | Human   | 810                                                         | .....T.....G.....                                            | 869                                                         |     |
| Chimp | 917     | GTGGCAGTCTTTGACCTCTCCCTCCTGCTGAAAGTATTGACAGTGAAGTGTGA       | 976                                                          |                                                             |     |
| Human | 870     | .....T.....                                                 | 929                                                          |                                                             |     |
| Chimp | 977     | GAAGAACTGGGAAAGAAATGCCAGAACATGACCTGATGCTCAGTGCAGCAGCACC     | 1036                                                         |                                                             |     |
| Human | 930     | .....T.....A.....G.....                                     | 989                                                          |                                                             |     |
| Chimp | 1037    | TCTCCGAGTCAATGGGCTGGCATCACCAGTGTCAAGTTGATTTTCTGCTACTTAC     | 1096                                                         |                                                             |     |
| Human | 990     | .....T.....G.....C.....                                     | 1049                                                         |                                                             |     |
| Chimp | 1097    | ACACACCAGAAGCAGGAGCCCATCGCAGATGCTATATAAACCAGTCCGGTAGCAGA    | 1156                                                         |                                                             |     |
| Human | 1050    | .....G.....                                                 | 1109                                                         |                                                             |     |
| Chimp | 1157    | CAGTCAGTACATGACTGCATAAGGCTCCGTCACAGCCCTCAGGGCTCTGTATCAGGAAG | 1216                                                         |                                                             |     |
| Human | 1110    | .....T.....                                                 | 1169                                                         |                                                             |     |
| Chimp | 1217    | GGAGTGTGCTGCAACTCTGGCCAAAGATGAGAAGTTGGCTGATCTCCACTCAGAGA    | 1276                                                         |                                                             |     |
| Human | 1170    | .....T.....                                                 | 1229                                                         |                                                             |     |

232  
233 **Supplementary Figure. BLAST alignment between the chimpanzee and human amplified**  
234 **sequences for intron 6 (a), 9 (b) and 19 (c).** Dots represent identities, lowercase letters show  
235 low complexity sequences.

## 236 Supplementary Information References

- 237 91. Pusapati, G. V. *et al.* CRISPR Screens Uncover Genes that Regulate Target Cell  
238 Sensitivity to the Morphogen Sonic Hedgehog. *Dev. Cell* (2018).  
239 doi:10.1016/j.devcel.2017.12.003
- 240 92. Langmead, B. & Salzberg, S. L. Fast gapped-read alignment with Bowtie 2. *Nat. Methods*  
241 (2012). doi:10.1038/nmeth.1923
- 242 93. Zhang, Y. *et al.* Model-based analysis of ChIP-Seq (MACS). *Genome Biol.* (2008).  
243 doi:10.1186/gb-2008-9-9-r137
- 244 94. Grant, C. E., Bailey, T. L. & Noble, W. S. FIMO: Scanning for occurrences of a given  
245 motif. *Bioinformatics* (2011). doi:10.1093/bioinformatics/btr064
- 246 95. Bernstein, B. E. *et al.* An integrated encyclopedia of DNA elements in the human genome.  
247 *Nature* **489**, 57–74 (2012).
- 248 96. Altschul, S. F., Gish, W., Miller, W., Myers, E. W. & Lipman, D. J. Basic local alignment  
249 search tool. *J. Mol. Biol.* (1990). doi:10.1016/S0022-2836(05)80360-2
- 250 97. Fishilevich, S. *et al.* GeneHancer: genome-wide integration of enhancers and target genes  
251 in GeneCards. *Database (Oxford)*. (2017). doi:10.1093/database/bax028
- 252 98. Pear, W. S., Nolan, G. P., Scott, M. L. & Baltimore, D. Production of high-titer helper-  
253 free retroviruses by transient transfection. *Proc. Natl. Acad. Sci. U. S. A.* (1993).  
254 doi:10.1073/pnas.90.18.8392
- 255 99. Bishop, B. *et al.* Structural insights into hedgehog ligand sequestration by the human  
256 hedgehog-interacting protein HHIP. *Nat. Struct. Mol. Biol.* (2009).  
257 doi:10.1038/nsmb.1607
- 258 100. Danielian, P. S., Muccino, D., Rowitch, D. H., Michael, S. K. & McMahon, A. P.  
259 Modification of gene activity in mouse embryos in utero by a tamoxifen-inducible form of  
260 Cre recombinase. *Curr. Biol.* (1998). doi:10.1016/s0960-9822(07)00562-3  
261
